# Supplementary material for: The Biostimulant, Potassium Humate Ameliorates Abiotic Stress in Arabidopsis thaliana by Increasing Starch Availability
Source: MDPI journal article supplement (doi:10.3390/ijms241512140), 2023-07-28
Supplement: s1 [file s1]

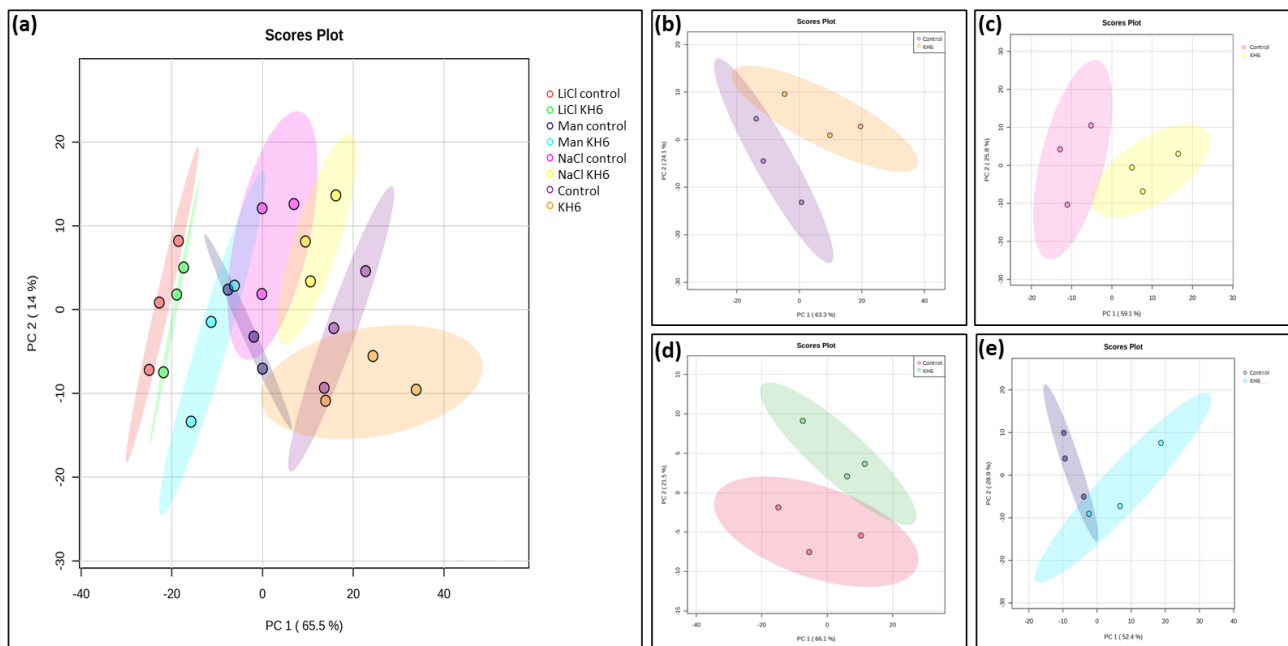

**Figure S1. Principal component analysis (PCA) of *A. thaliana* primary metabolites identified by gas chromatography coupled with mass spectrometry (GC-MS).** (a) Global difference of the metabolic distribution of all treatments tested (under control, salt (NaCl and LiCl) and osmotic stress (mannitol)) and presence or absence of potassium humate. Different metabolic distribution under (b) control, (c) 140 mM NaCl, (d) 24 mM LiCl and (e) 280 mM mannitol conditions.

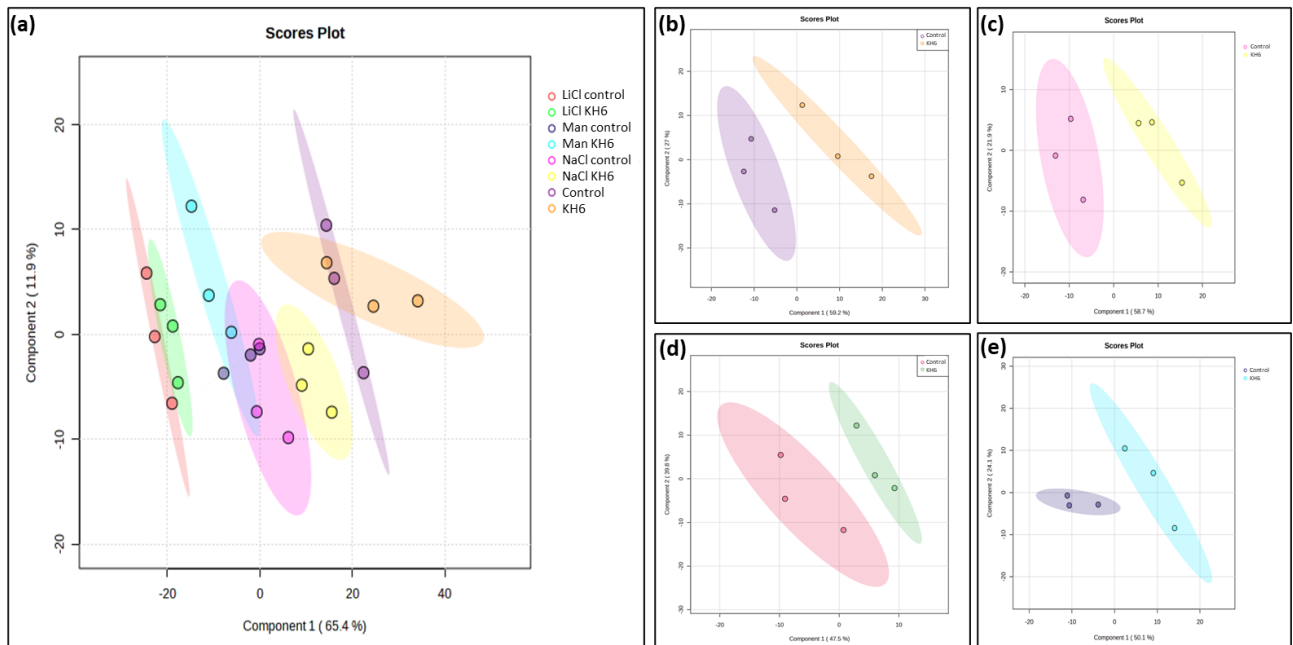

**Figure S2. Partial least squares-discriminant analysis (PLS-DA) score plot of *A. thaliana* primary metabolite profiles.** (a) Comparative analysis of the four tested conditions (under control, salt (NaCl and LiCl) and osmotic stress (mannitol)) and presence or absence of potassium humate. Different metabolic distribution under (b) control, (c) 140 mM NaCl, (d) 24 mM LiCl and (e) 280 mM mannitol conditions.

**Supplementary Table S1.** Distribution of the significantly differentially accumulated metabolites between the different conditions tested, represented in the Venn diagrams.

| Conditions                           | Significantly differentially accumulated metabolites                         | Conditions                    | Significantly up-accumulated metabolites                                                      | Conditions               | Significantly down-accumulated metabolites         |
|--------------------------------------|------------------------------------------------------------------------------|-------------------------------|-----------------------------------------------------------------------------------------------|--------------------------|----------------------------------------------------|
| [No stress]                          | Spermidine, Valine, Serine, Leucine, Sucrose, Malonic acid                   | [No stress]                   | Serine, Leucine, Sucrose, Malonic acid, Maltose, Glycine                                      | [No stress]              | Spermidine, Valine ,Lysine                         |
| [NaCl]                               | Tartaric acid, GABA, Phenylalanine, Urea, alpha-ketoglutaric acid, Ornithine | [NaCl]                        | Tartaric acid, GABA, Phenylalanine, Urea, alpha-ketoglutaric acid, Lysine, Alanine, Ornithine | [NaCl]                   | Phosphoric acid, Glycine, Oxalic acid              |
| [LiCl]                               | Putrescine, Threonine acid, Glyceric acid                                    | [LiCl]                        | Glyceric acid                                                                                 | [LiCl]                   | Putrescine, Threonine acid                         |
| [Mannitol]                           | Gluconic acid. lactone, Fructose, Glucose                                    | [Mannitol]                    | Oxalic acid                                                                                   | [Mannitol]               | Alanine, Gluconic acid. lactone, Fructose, Glucose |
| [No stress] [NaCl]                   | Lysine, Succinic acid, Glycine                                               | [No stress] [NaCl]            | Succinic acid                                                                                 | [LiCl] [Mannitol]        | Proline                                            |
| [No stress] [Mannitol]               | Maleic acid                                                                  | [No stress] [Mannitol]        | Maleic acid                                                                                   | [NaCl] [LiCl] [Mannitol] | Maltose                                            |
| [NaCl] [LiCl]                        | Glutamic acid                                                                | [NaCl] [LiCl]                 | Glutamic acid                                                                                 |                          |                                                    |
| [NaCl] [Mannitol]                    | Oxalic acid, Aspartic acid, Fumaric acid, Alanine, Malic acid                | [NaCl] [Mannitol]             | Aspartic acid, Fumaric acid, Malic acid                                                       |                          |                                                    |
| [LiCl] [Mannitol]                    | Proline                                                                      | [No stress] [LiCl] [Mannitol] | Phosphoric acid                                                                               |                          |                                                    |
| [No stress] [NaCl] [LiCl] [Mannitol] | Maltose, Phosphoric acid                                                     |                               |                                                                                               |                          |                                                    |
